# Supplementary material for: Metal-catalyzed radical polyaddition as a novel polymer synthetic route
Source: Royal Society of Chemistry journal article supplement (doi:10.1039/b616598b), 2007-01-01
Supplement: b616598b.pdf [file b616598b.pdf]

Electronic Supplementary Information for the Manuscript:

## **Metal-Catalyzed Radical Polyaddition as a Novel Polymer Synthetic Route**

Kotaro Satoh, Masato Mizutani, and Masami Kamigaito\*

Department of Applied Chemistry, Graduate School of Engineering, Nagoya University,  
Furo-cho, Chikusa-ku, Nagoya 464-8603, Japan

E-mail: kamigaito@apchem.nagoya-u.ac.jp

### **Experimental Section**

**Materials.** RuCl<sub>2</sub>(PPh)<sub>3</sub> (Wako), FeCl<sub>2</sub> (Aldrich; 99.99%), CuCl (Aldrich; 99.99%), and *n*-Bu<sub>3</sub>P (KANTO ; > 98%) were used as received and handled in a glove-box (VAC Nexus) under a moisture- and oxygen-free argon atmosphere (O<sub>2</sub> < 1 ppm). PMDETA (Tokyo Kasei; > 98%) was distilled over calcium hydride before use. All other reagents were purified by usual methods.

**Monomer Synthesis (1–3).** Allyl 2-chloropropanoate (**1**) and 3-butenyl 2-chloropropionate (**2**) were synthesized from 2-chloropropionyl chloride (Aldrich; 97%) and the corresponding alcohols; i.e. allyl alcohol (Tokyo Kasei; > 99%) and 3-buten-1-ol (Tokyo Kasei; > 98%) for **1** and **2**, respectively. CH<sub>2</sub>=CHCH<sub>2</sub>C(CO<sub>2</sub>Me)(Me)Cl (**3**) was prepared according to the literature.<sup>1</sup> The reaction was carried out by the syringe technique under dry argon atmosphere in an oven-dried glass tube equipped with three-

way stopcocks. A typical synthetic example for **2** is given below. 2-Chloropropionyl chloride (51.0 mL, 0.525 mol) was added dropwise with vigorous stirring to a solution of 3-buten-1-ol (42.4 mL, 0.50 mol) and triethylamine (76.7 mL, 0.55 mol) in dry THF (80.0 mL) at 0 °C. The mixture kept stirred for 1 h at 0 °C, and then over 12 h at room temperature. After the dilution with diethyl ether, the mixture was washed with 10% aqueous solution of NaHCO<sub>3</sub> and then water and evaporated to remove the solvents. The monomer was distilled over calcium hydride under reduced pressure to give pure 3-butenyl 2-chloropropionate (**2**) (56.0 mL, 0.354 mol) (yield = 70.9%, purity > 99%). Figure S1 shows the <sup>1</sup>H NMR spectra of the monomers (**1–3**).

**Polymerizations.** Polymerization was carried out under dry nitrogen in baked glass tubes equipped with a three-way stopcock. A typical example for the polymerization procedure is given below. To a suspension of FeCl<sub>2</sub> (50.7 mg, 0.40 mmol) in toluene (1.27 mL) was added *n*-Bu<sub>3</sub>P (0.20 mL, 0.80 mmol), and the mixture kept stirred for 24 h at 80 °C to give a homogeneous solution of the FeCl<sub>2</sub>(*n*-Bu<sub>3</sub>P)<sub>*n*</sub> complex. After the solution was cooled to the room temperature, 3-butenyl 2-chloropropionate (**2**) (2.53 mL, 16.0 mmol) was added. The solution was evenly charged in 8 glass tubes and the tubes were sealed by flame under nitrogen atmosphere. The tubes were immersed in thermostatic oil bath at 100 °C. In predetermined intervals, the polymerization was terminated by cooling the reaction mixtures to –78 °C. Monomer conversion was determined from the concentration of residual monomer measured by gas chromatography with toluene as an internal standard.

**Measurements.** Monomer conversion was determined from the concentration of

residual monomer measured by gas chromatography [Shimadzu GC-8A equipped with a thermal conductivity detector and a 3.0 mm i.d.  $\times$  2 m stainless steel column packed with SBS-200 (Shinwa Chemical Industries Ltd.) supported on Shimalite W; injection and detector temperature = 200 °C, column temperature = 160 °C] with toluene as an internal standard under He gas flow.  $^1\text{H}$  NMR spectra were recorded in  $\text{CDCl}_3$  at 25 °C on a Varian Gemini 2000 spectrometer, operating at 400 MHz. The number-average molecular weight ( $M_n$ ) and weight-average molecular weight ( $M_w$ ) of the product polymers were determined by size-exclusion chromatography (SEC) in THF at 40 °C on two polystyrene gel columns [Shodex K-805L (pore size: 20–1000 Å; 8.0 mm i.d.  $\times$  30 cm)  $\times$  2; flow rate 1.0 mL/min] connected to Jasco PU-980 precision pump and a Jasco 930-RI detector. The columns were calibrated against 7 standard poly(MMA) samples (Shodex;  $M_p$  = 1990–1950000;  $M_w/M_n$  = 1.02–1.09). MALDI-TOF-MS spectra were measured on an Applied Biosystems Voyager-DE STR spectrometer (reflector mode) with dithranol (1,8,9-anthracenetriol) as the ionizing matrix and sodium trifluoroacetate as the ion source. The experiment was carried out at an accelerating potential of 22 kV, where 256 laser shots were accumulated.

## References

1. J. Villiéras, D. Payan, Y. Anguelova, J.-F. Normant. *J. Organomet. Chem.* 1972, **42**, C5.

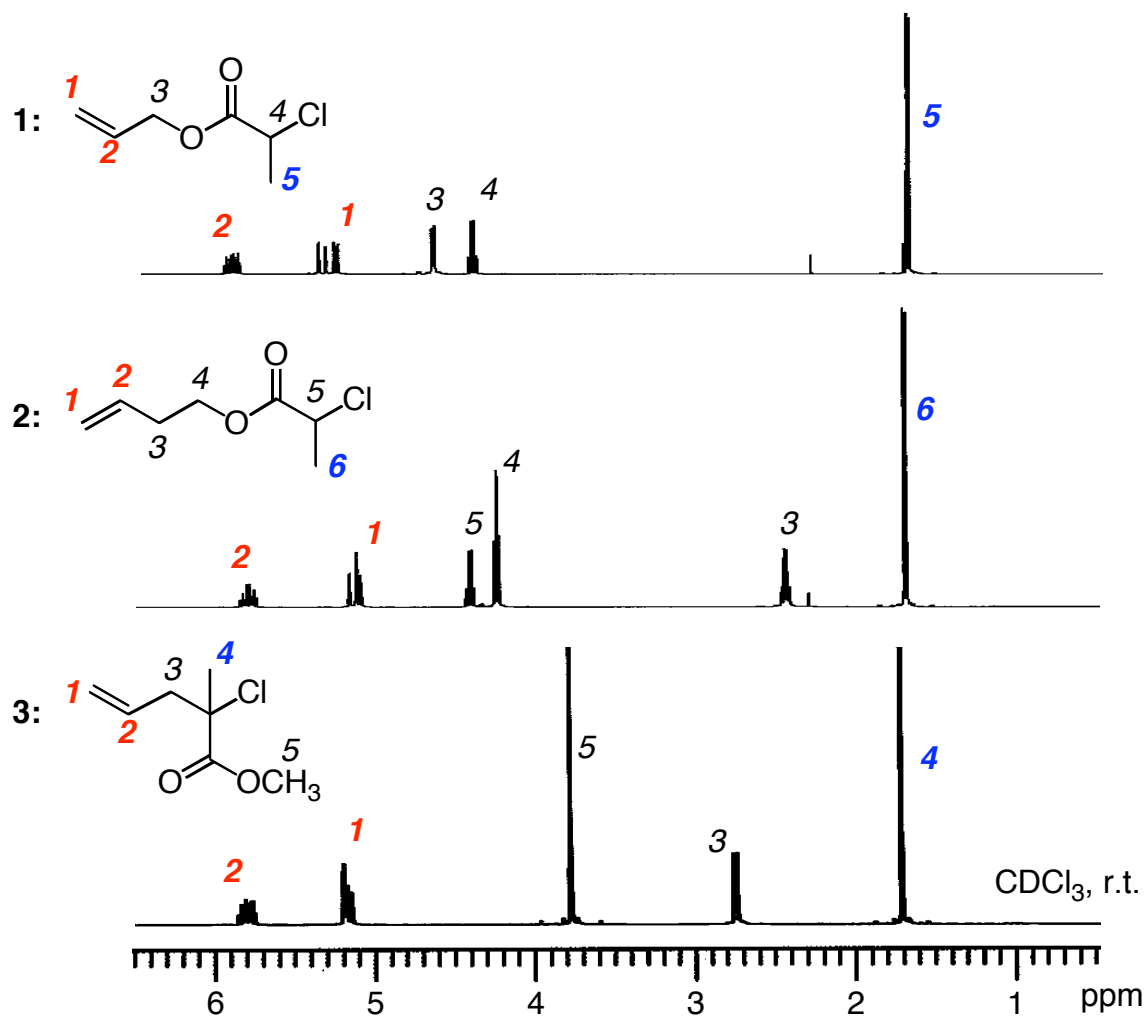

Figure S1.  $^1\text{H}$  NMR spectra of 1–3.

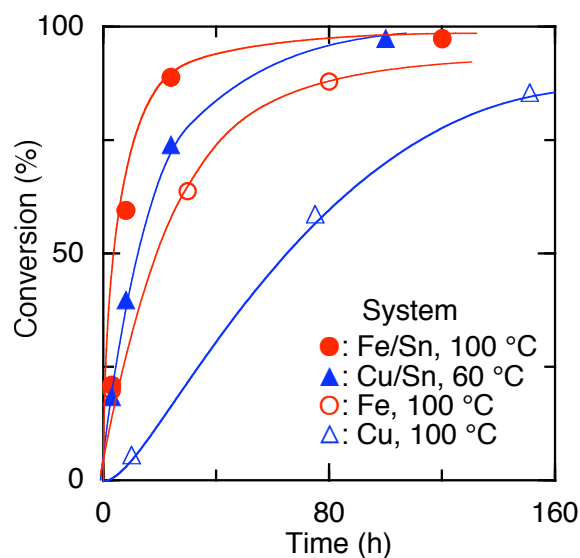

**Figure S2.** Effects of  $\text{Sn}(\text{EH})_2$  on the polyaddition of 3-butenyl 2-chloropropionate (**2**) with the  $\text{FeCl}_2/\text{Pn-Bu}_3$  or  $\text{CuCl}/\text{PMDETA}$  system:  $[\mathbf{2}]_0 = 4.0 \text{ M}$ ;  $[\text{Mt}]_0 = 100 \text{ mM}$ ;  $[\text{ligand}]_0 = 200 \text{ (Pn-Bu}_3\text{) or } 400 \text{ mM (PMDETA)}$ ;  $[\text{Sn}(\text{EH})_2]_0 = 45 \text{ mM}$  (EH: 2-ethylhexanoate) in toluene.

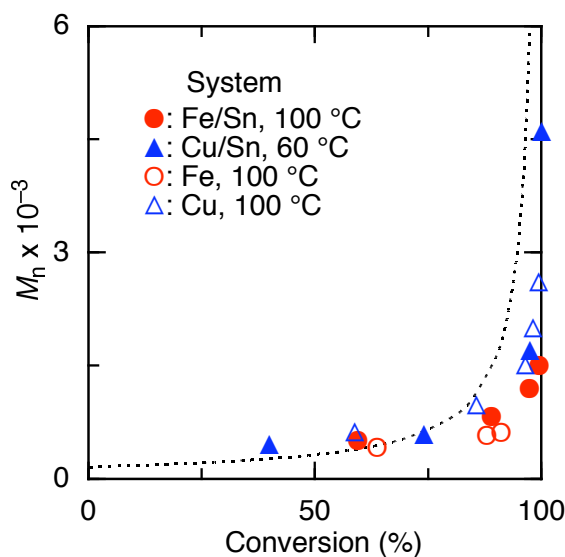

**Figure S3.**  $M_n$ ,  $M_w/M_n$ , and MWD curves of poly(**2**) obtained in the same experiments as for Figure S2. The dotted line indicates the calculated  $M_n$  assuming the following equation:  $M_n = \text{molecular weight of } \mathbf{2} / (1 - \text{conversion})$ .
